# Supplementary material for: The imprinted Zdbf2 gene finely tunes control of feeding and growth in neonates
Source: eLife. 2022 Jan 20;11:e65641. doi: 10.7554/eLife.65641 (PMC8809892; doi:10.7554/eLife.65641)
Supplement: Figure 2—source data 1. — (A) Number of living pups followed every two days from 1 to 21dpp and every week from 21 to 84dpp from 24 litters coming from [female WT x male Zdbf2 KO/WT] crosses (Zdbf2-KO paternal transmission). These 24 litters come from four different crosses including 8 females and 4 males. Day one corresponds to the day of birth (1dpp). We can observe that the number of living Zdbf2-KO (males and females) starts decreasing from 3dpp onwards. (B) Number of living pups followed every two days from 1 to 21dpp and every week from 21 to 84dpp from 21 litters coming from [female WT x male Liz-LOF] crosses (Liz-LOF paternal transmission). These 21 litters come from five different crosses including 10 females and 5 males. Day one corresponds to the day of birth (1dpp). We can observe that the number of living Liz-LOF (males and females) starts decreasing from 3dpp onwards. (C) Number of living pups followed every week from 1 to 84dpp from 11 litters coming from [female Zdbf2 KO/WT x male WT] crosses (Zdbf2-Δexon6, maternal transmission, silent mutation). These 11 litters come from two different crosses including 4 females and 2 males. We did not observe any survivability bias within those litters. (D) Number of living pups followed every two days from 1 to 21dpp and every week from 21 to 84dpp from 11 litters coming from [female LizΔgDMR x male WT] crosses (LizΔgDMR, maternal transmission). These 11 litters come from two different crosses including 4 females and 2 males. Day one corresponds to the day of birth (1dpp). We did not observe any survivability bias within those litters. (E) Number of living pups followed every day from 1 to 21dpp from 19 litters coming from [female WT x male Zdbf2 KO/KO] crosses (Zdbf2-KO, homozygote transmission). These 19 litters come from five different crosses including 10 females and 5 males. All pups from these crosses inherited a mutated allele from their dad and are thus Zdbf2-KO. We did not observe any survivability bias within those litters. [file elife-65641-fig2-data1.xlsx]

## Sheet: Sheet1
Supplementary file 1: Survivability counts from different transmission of the Zdbf2-KO and LizΔgDMR alleles.
A. Zdbf2-KO (paternal transmission)
Days post partum		1	3	5	7	9	11	13	15	17	19	21	28	35	42	49	56	63	70	77	84
n=24 litters	Males WT	44	37	37	37	37	37	37	37	37	36	36	36	36	36	36	36	36	36	36	36
	Female WT	50	44	44	44	44	44	44	44	43	43	40	39	39	39	39	39	39	39	39	39
	Males KO	30	17	17	17	17	16	16	16	16	16	16	16	16	16	16	16	16	16	16	16
	Female KO	57	30	30	30	30	29	29	29	28	28	28	28	28	28	28	28	27	27	27	27
B. Liz-LOF (paternal transmission)
Days post partum		1	3	5	7	9	11	13	15	17	19	21	28	35	42	49	56	63	70	77	84
n= 21 litters	Males WT	43	41	41	41	41	40	40	40	40	40	39	37	37	37	37	37	37	37	37	37
	Female WT	40	31	31	31	31	31	29	29	29	29	29	26	26	26	26	26	26	26	26	26
	Males KO	38	35	35	35	35	34	34	34	34	34	34	32	32	32	32	32	32	32	32	32
	Female KO	42	30	29	29	27	27	26	26	26	25	25	22	22	22	22	22	22	22	22	22
C. Zdbf2-Δexon6 (maternal transmission)
Days post partum		1	7	14	21	28	35	42	49	56	63	70	77	84
n=11 litters	Males WT	19	16	15	15	15	15	15	15	15	15	15	15	15
	Female WT	19	14	14	14	14	14	14	14	14	14	14	14	14
	Males KO	16	14	14	14	14	13	13	13	13	13	13	13	13
	Female KO	31	24	24	24	24	24	24	24	24	24	24	24	24
D. LizΔgDMR (maternal transmission)
Days post partum		1	7	14	21	28	35	42	49	56	63	70	77	84
n= 11 litters	Males WT	15	14	14	14	13	13	13	13	13	10	13	13	13
	Female WT	22	20	19	19	15	15	15	15	15	14	15	15	15
	Males KO	25	23	23	20	21	21	21	21	21	18	21	20	21
	Female KO	32	28	28	24	24	24	24	24	24	21	24	24	24
E. Zdbf2-KO (homozygote transmission)
Days post partum		1	2	3	4	5	6	7	8	9	10	11	12	13	14	15	16	17	18	19	20	21
n=19 litters	Males KO	71	54	54	54	54	54	54	54	54	54	54	53	53	53	53	53	53	53	53	52	52
	Female KO	80	62	58	58	58	58	58	58	58	58	58	58	58	58	58	58	58	58	58	57	57
