# Supplementary material for: The imprinted Zdbf2 gene finely tunes control of feeding and growth in neonates
Source: eLife. 2022 Jan 20;11:e65641. doi: 10.7554/eLife.65641 (PMC8809892; doi:10.7554/eLife.65641)
Supplement: Figure 6—source data 1. — Raw data for the RNA-seq on hypothalamus at 3dpp and 10dpp. Tables are showing the rpkm value, FDR and logFC for the 11 differentially expressed genes between WT and Zdbf2-KO. [file elife-65641-fig6-data1.xlsx]

## Sheet: 3dpp DE genes
Figure 6-source data 1: List of differentially expressed genes in the hypothalamus of Zdbf2-KO versus WT males at 3dpp.
Gene Name	Gene ID	3dpp-Zdbf2-WT1	3dpp-Zdbf2-WT2	3dpp-Zdbf2-WT3	3dpp-Zdbf2-KO1	3dpp-Zdbf2-KO2	3dpp-Zdbf2-KO3	Mean 3dpp-WT	Mean 3dpp-KO	FDR	logFC
Prrt1	ENSMUSG00000015476	16.767090156288273	15.527189825890597	14.475110775823943	19.983189234100593	18.41110393968952	20.77266076835608	15.58979691933427	19.7223179807154	0.06021931372710519	0.3374105320177261
Zdbf2	ENSMUSG00000027520	25.74184033436552	25.025557644545685	25.911194427628736	31.636607847372105	29.000007772551562	34.6651809363841	25.55953080217998	31.767265518769253	0.028895551921515647	0.31282169723013653
Sparcl1	ENSMUSG00000029309	281.0548278496053	270.7811969026177	295.3814357135992	228.51387491797354	226.71191369320863	244.19020596389174	282.40582015527406	233.13866485835797	0.007196817212490972	-0.27752613357798983
Tra2a	ENSMUSG00000029817	19.975365411848838	16.430553031046376	17.5925210688302	22.12224976321008	21.759376893746335	22.775239547810678	17.999479837241804	22.21895540158903	0.06021931372710519	0.3027828163638185
Npy	ENSMUSG00000029819	79.83814230386496	112.50526454244743	102.8213909822242	71.17697888880863	73.60973347017493	58.33248830737711	98.38826594284554	67.70640022212022	0.06021931372710519	-0.5416128397775006
Agt	ENSMUSG00000031980	39.709147967898105	37.68395727396157	48.26837348438679	24.774857190234393	30.6470274894114	30.715750290390815	41.88715957541549	28.7125449900122	0.006668152915013039	-0.5446275685641184
Pla2g3	ENSMUSG00000034579	7.923557549962039	8.342344111836972	9.444219961524478	5.991797484853613	7.3063875140002255	6.105111310864177	8.57004054110783	6.467765436572672	0.06021931372710519	-0.4071331505314545
Pigz	ENSMUSG00000045625	0.5949937704119183	0.4604962245128098	0.473858301477335	0.23355782868687214	0.18438794730895902	0.29290766135091845	0.5097827654673543	0.23695114578224988	0.09020690047063307	-1.0844942692381743
Proser1	ENSMUSG00000049504	3.4527826077520327	3.8659539272225065	3.6816312486291944	2.6836297414407695	2.6054975989221796	3.028728456528945	3.6667892612012447	2.7726185989639647	0.06021931372710519	-0.40321631636497823
Fat2	ENSMUSG00000055333	0.21006030449147825	0.14819813242952723	0.29698501511057984	0.06247664352012702	0.08930803047713876	0.10655967816525205	0.21841448401052843	0.08611478405417261	0.03892173490017685	-1.3247748487741218
Fendrr	ENSMUSG00000097336	0.31183540321993286	0.3240551577266965	0.3121136218615891	0.094578637678225	0.1735858006250414	0.1344271584875407	0.31600139426940616	0.13419719893026902	0.06021931372710519	-1.2360136050645636

## Sheet: 10dpp DE genes
Figure 6-source data 1: List of differentially expressed genes in the hypothalamus of Zdbf2-KO versus WT males at 3dpp.
Gene Name	Gene ID	10dpp-Zdbf2-WT1	10dpp-Zdbf2-WT2	10dpp-Zdbf2-KO1	10dpp-Zdbf2-KO2	Mean 10dpp-WT	Mean 10dpp-KO	FDR	logFC
Folr1	ENSMUSG00000001827	2.547026087862923	1.5822522890552733	0.2766588388791138	0.8345349512327053	2.064639188459098	0.5555968950559096	0.07059236021754646	-1.9009510793174087
Aqp1	ENSMUSG00000004655	2.872016310415548	1.5940234018129293	0.2734582210744349	0.6370413052729821	2.2330198561142387	0.45524976317370847	2.9463492483605767e-4	-2.301805402504377
Enpp2	ENSMUSG00000022425	50.9106655898852	30.552737272563682	18.425169034774235	22.200706895713335	40.73170143122444	20.312937965243783	0.005242114710183869	-1.0009280101677565
Cldn1	ENSMUSG00000022512	1.2392628021700678	1.2044861386699304	0.5190691946709978	0.6278523005839926	1.221874470419999	0.5734607476274951	0.001653444061076547	-1.0912211421991935
Clic6	ENSMUSG00000022949	3.6523724082056206	3.138979418851915	1.6236212388996534	2.0601081891220927	3.395675913528768	1.841864714010873	2.9463492483605767e-4	-0.8852308021419745
Car12	ENSMUSG00000032373	0.8084403347633075	0.6396050521645779	0.31641337657750035	0.34044093544325044	0.7240226934639427	0.3284271560103754	2.9463492483605767e-4	-1.1464445793602198
Mfrp	ENSMUSG00000034739	0.6657937372981639	0.23699181197949232	0.03187563215552077	0.06318566757800527	0.4513927746388281	0.04753064986676302	1.057338139888172e-4	-3.2558936432774126
Sostdc1	ENSMUSG00000036169	5.624176074334929	5.392133739741459	3.408358856493186	3.8751069466416452	5.508154907038193	3.6417329015674156	0.07290417135256345	-0.5965148168494818
Kcne2	ENSMUSG00000039672	1.2434938955694885	1.2519886103058355	0.1720021377908656	0.44771513333081475	1.247741252937662	0.30985863556084015	1.057338139888172e-4	-2.0185224258755814
Btaf1	ENSMUSG00000040565	5.486409481701314	6.075960708452488	4.284076112276074	4.439090383899557	5.781185095076901	4.361583248087816	0.033463892484214386	-0.40006850309084996
Sem1	ENSMUSG00000042541	17.36959457289554	18.101679177261126	13.370263605427123	14.758410247829932	17.735636875078335	14.064336926628528	0.06888945767893204	-0.33042402727869663
Msx1	ENSMUSG00000048450	1.1796142106392795	0.9439291866920204	0.36578034099083684	0.5305392637063123	1.06177169866565	0.44815980234857455	0.007096385923093436	-1.2551928394528198
Ide	ENSMUSG00000056999	24.68625178539833	23.989122751880522	16.151782969257773	16.198689453270216	24.337687268639428	16.175236211263993	4.6198162578787376e-14	-0.5857745392107107
Hba-a1	ENSMUSG00000069919	20.31113216648779	18.633380187790017	27.255502659946714	26.45535829198835	19.472256177138902	26.85543047596753	0.06036517696233158	0.46436971228989626
Rpl39	ENSMUSG00000079641	63.87472776974549	69.7806384972302	46.70476306599073	51.858150778229884	66.82768313348785	49.28145692211031	5.443629116062429e-4	-0.4347947015267667
Gm10736	ENSMUSG00000096842	579.010632558235	622.958920678756	381.8579768293978	449.7795239677854	600.9847766184955	415.8187503985916	0.0010030150598680633	-0.5272313769506951
