# Supplementary material for: The imprinted Zdbf2 gene finely tunes control of feeding and growth in neonates
Source: eLife. 2022 Jan 20;11:e65641. doi: 10.7554/eLife.65641 (PMC8809892; doi:10.7554/eLife.65641)
Supplement: Supplementary file 1. [file elife-65641-supp1.xlsx]

## Sheet: Feuil1
Spplementary file 1: List of primers used in this study.
RT-qPCR primer
Zdbf2 exons 1-3	Fwd	CCGGAAGGAGAGCAGGAG
	Rev	GAGCAGAAAAGAGCAAGCA
Zdbf2 exons 6-7	Fwd	CTGCGACACCACCCATATAA
	Rev	AAAACCACCACCACTTCAGG
Rplp0	Fwd	TCCAGAGGCACCATTGAAATT
	Rev	TCGCTGGCTCCCACCTT
Rrm2	Fwd	CCGAGCTGGAAAGTAAAGCG
	Rev	ATGGGAAAGACAACGAAGCG
Gh exons 4-5	Fwd	CTTGAGGATCTGCCCAACAC
	Rev	CCTCGGACCGTGTCTATGAG
Igf-1 exons 2-3	Fwd	TGGATGCTCTTCAGTTCGTG
	Rev	CACTCATCCACAATGCCTGT
18S	Fwd	GCCCTGTAATTGGAATGAGTCCACTT
	Rev	GTCCCCAAGATCCAACTACGAGCTTT
ßActin	Fwd	AAGTGACGTTGACATCCG
	Rev	GATCCACATCTGCTGGAAGG
Npy	Fwd	TGGCCAGATACTACTCCGCT
	Rev	TGAAATCAGTGTCTCAGGGCT
Agrp	Fwd	ACTGAAGGGCATCAGAAGG
	Rev	CTTCTTGAGGCCATTCAGAC
RT-pyrosequencing
Zdbf2 exon 6	Fwd	[Biotin]-GGAAATGAAGAGCAGCCCAGTAG
	Rev	GCCACTGTCTCAAGAGAACCATCA
	Seq	AACCATCACGTTCAGG
Bisulfite + Pyrosequencing Primers
sDMR	Fwd	AGATGGAAGGAAAGAATTGAATTTTATA
	Rev	[Biotin]-TACCAACCCACTATATACATTCTTCATTA
	Seq	TGAATTTTATATATTATTTTTTGAT
Bisulfite + Cloning/Sequencing Primers
sDMR	Outer Fwd	ATTTTATGTATTTATTAGTGAGTTG
	Outer Rev	CTAATCACAACTCCCAATCAC
	Inner Fwd	GAATTGAATTTTATATATTATTTTTTG
	Inner Rev	CCTATATACAACTTACCTTACTT
Genotyping Primers
Zdbf2-KO	Fwd	AGCACATTTTCTTCCATTTACTTGT
	Rev	ACTCCAGTACCCCACACACA
Zdbf2-GOF	Fwd	CACCGATTGCTAGAACTACAATGG
	Rev	GAAAGCAATGCACACACTGG
Liz-LOF	Fwd	TTTTTCTTTTGCCTCCAAGAA
	Rev	CCTGGACAGCATTTCTTTCTC
	Rev	TGGCTTTAAAACAGGGGATG
CRISPR sgRNA oligos
Zdbf2-KO	Left	CACCGCATTACAATGTATGCTACGA
		AAACTCGTAGCATACATTGTAATGC
	Right	CACCGTTTACCATGGATGCACTCCC
		AAACGGGAGTGCATCCATGGTAAAC
